# Supplementary material for: Association of early life physical and sexual abuse with premature mortality among female nurses: prospective cohort study
Source: PubMed Central journal article supplement — BMJ. 2023 May 3;381:e073613. doi: 10.1136/bmj-2022-073613 (PMC10155244; doi:10.1136/bmj-2022-073613), 2023-05-03
Supplement: wany073613.ww.pdf [file wany073613.ww.pdf]

## **SUPPLEMENTAL MATERIAL**

### **Association of early life physical and sexual abuse with premature mortality among female nurses: prospective cohort study**

Yi-Xin Wang, Yang Sun, Stacey A. Missmer, Kathryn M. Rexrode, Andrea L Roberts, Jorge E. Chavarro, and Janet W. Rich-Edwards

Figure S1. Cohort design, data collection, and exclusion criteria.

Table S1. Age-standardized characteristics for included female nurses versus those excluded due to a lack of exposure information in 2001 (Nurses' Health Study II, 2001-19).

Table S2. The summary measure of cumulative physical and sexual abuse.

Table S3. Categories for causes of death.

Table S4. Hazard ratio (HR) (95% confidence interval (CI)) for the risk of cause-specific premature mortality (before age 70 y) according to early life abuse and social support among 67,726 female nurses (Nurses' Health Study II, 2001-19).

Table S5. Hazard ratio (HR) (95% confidence interval (CI)) for the risk of cause-specific premature mortality (before age 70 y), according to the cumulative history of physical and sexual abuse during childhood or adolescence among 67,726 female nurses (Nurses' Health Study II, 2001-19).

Table S6. Hazard ratio (HR) (95% confidence interval (CI)) for the risk of cause-specific premature mortality (before age 70 y) according to the joint categories of early life physical abuse, sexual abuse, and social support among 67,726 female nurses (Nurses' Health Study II, 2001-19).

Table S7. Sensitivity analyses for the associations between early life physical and sexual abuse and the risk of all-cause mortality (Nurses' Health Study II, 2001-19).

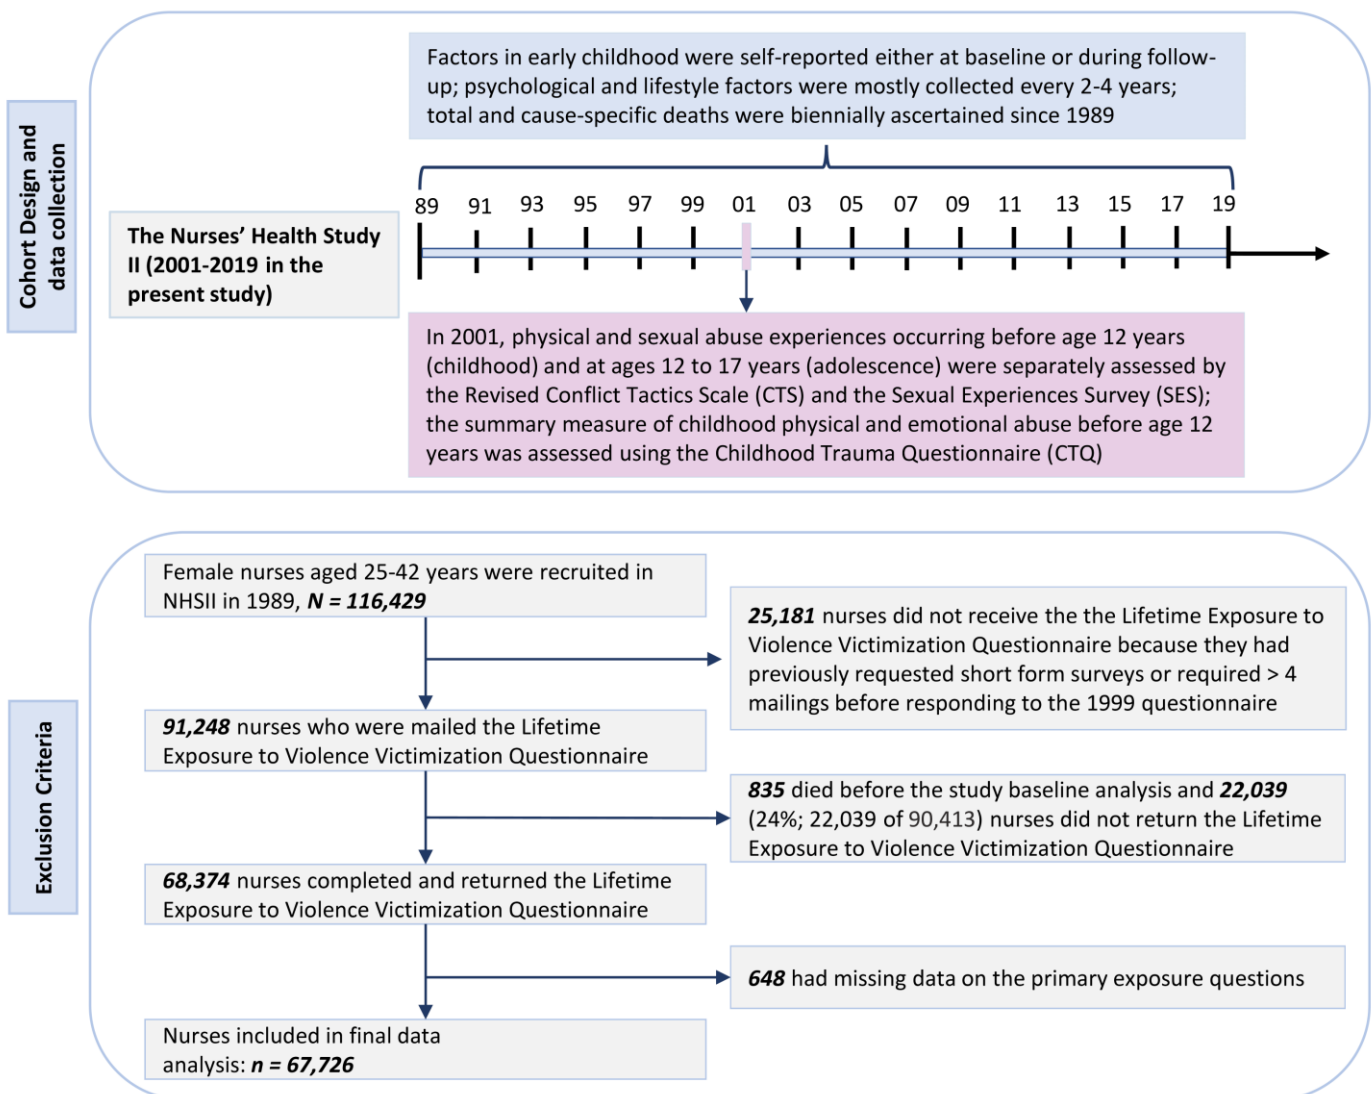

**Figure S1. Cohort design, data collection, and exclusion criteria.**

**Table S1. Age-standardized characteristics for included female nurses versus those excluded due to a lack of exposure information in 2001 (Nurses' Health Study II, 2001-19).**

| Characteristics <sup>a</sup>                       | Included      | Excluded      |
|----------------------------------------------------|---------------|---------------|
| No.                                                | 67,726        | 47,868        |
| Age (year), mean (SD)                              | 46.6 (4.7)    | 47 (4.7)      |
| White, N (%)                                       | 63,634 (94.0) | 42,197 (88.1) |
| Age at menarche, mean (SD)                         | 12.4 (1.4)    | 12.4 (1.5)    |
| BMI (kg/m <sup>2</sup> ), N (%)                    |               |               |
| <18.5                                              | 840 (1.3)     | 719 (1.5)     |
| 18.5-24.9                                          | 32,400 (48.1) | 21,311 (44.1) |
| 25-29.9                                            | 18,421 (27.1) | 13,319 (28.0) |
| ≥30                                                | 16,065 (23.6) | 12,519 (26.4) |
| Parental history of CVD before age 60 years, N (%) | 18,986 (27.8) | 11,109 (23.5) |
| Total physical activity (h/wk), mean (SD)          | 2.4 (3.2)     | 2.5 (3.9)     |
| AHEI-2010 dietary score, <sup>b</sup> mean (SD)    | 55.8 (12.8)   | 52.3 (12.4)   |
| Alcohol intake (g/d), mean (SD)                    | 4.0 (7.3)     | 3.7 (7.0)     |
| Parity, <sup>c</sup> mean (SD)                     | 1.9 (1.2)     | 1.8 (1.2)     |
| Smoking status, N (%)                              |               |               |
| Never                                              | 44,319 (65.7) | 29,833 (62.0) |
| Past                                               | 17,672 (25.8) | 11,829 (25.1) |
| Current 1-34 cigarettes/day                        | 5372 (7.9)    | 4328 (9.1)    |
| Current ≥35 cigarettes/day                         | 290 (0.4)     | 226 (0.5)     |
| OC use, N (%)                                      |               |               |
| Never                                              | 5796 (8.9)    | 3213 (6.4)    |
| Past                                               | 52,676 (77.5) | 30,311 (64.0) |
| Current                                            | 8918 (13.2)   | 5166 (10.9)   |

<sup>a</sup>Values are means (SD) or N (percentages); means (SD) and percentages of all variables except for age are age-standardized. <sup>b</sup>A total of 10763 (9.3%) women had missing data on baseline diet scores (including alcohol intake). <sup>c</sup>Pregnancies lasting at least six months.

**Table S2. The summary measure of cumulative physical and sexual abuse.**

|                                  | Sexual Abuse <sup>b</sup>                           |                                                     |                                                     |                                              |
|----------------------------------|-----------------------------------------------------|-----------------------------------------------------|-----------------------------------------------------|----------------------------------------------|
|                                  | No abuse                                            | Touched only                                        | Forced sex as a child or adolescent                 | Forced sex as a child and adolescent         |
| Physical Abuse <sup>a</sup>      |                                                     |                                                     |                                                     |                                              |
| None                             | No exposure to violence (Level 1)                   | Mild or moderate single type (Level 2)              | Mild multiple types or severe-single type (Level 3) | Moderate chronic or multiple types (Level 4) |
| Mild to Moderate                 | Mild or moderate single type (Level 2)              | Mild multiple types or severe single type (Level 3) | Moderate chronic or multiple types (Level 4)        | Severe chronic or multiple types (Level 5)   |
| Severe as a child or adolescent  | Mild multiple types or severe single type (Level 3) | Moderate chronic or multiple types (Level 4)        | Severe chronic or multiple types (Level 5)          | Severe chronic and multiple types (Level 6)  |
| Severe as a child and adolescent | Moderate chronic or multiple types (Level 4)        | Severe chronic or multiple types (Level 5)          | Severe chronic and multiple types (Level 6)         | Severe chronic and multiple types (Level 6)  |

<sup>a</sup>Physical abuse categories: none; mild (being “pushed, grabbed, or shoved” at any frequency or being “kicked, bitten, or punched” once or “hit with something” once); moderate (being “hit with something” more than once or “physically attacked” once); and severe (being “kicked, bitten, or punched” or “physically attacked” more than once or ever “choked or burned”).

<sup>b</sup>Sexual abuse categories: none, touched only (touched in a sexual way as a child and/or adolescent), forced sex as a child or adolescent (forced into any sexual activity by an adult or older child as a child or adolescent), forced sex as a child and adolescent (forced into any sexual activity by an adult or older child as a child and adolescent).

**Table S3. Categories for causes of death.**

| Causes of death                                                                                                                                                                                                                                                                                                                                                                                  | ICD-8 code       | Case numbers<br>(n=2410) |
|--------------------------------------------------------------------------------------------------------------------------------------------------------------------------------------------------------------------------------------------------------------------------------------------------------------------------------------------------------------------------------------------------|------------------|--------------------------|
| Cancer<br><i>e.g., malignant neoplasm of the buccal cavity and pharynx, digestive organs and peritoneum, peritoneum and retroperitoneal tissue, respiratory system, genito-urinary organs, bone, connective tissue, skin, and breast.</i>                                                                                                                                                        | 140-207          | 874                      |
| Cardiovascular disease<br><i>e.g., acute rheumatic fever, chronic rheumatic heart disease, hypertensive disease, ischaemic heart disease, cerebrovascular disease, diseases of arteries, arterioles and capillaries, diseases of veins and lymphatics, and other diseases of the circulatory system.</i>                                                                                         | 390-458          | 154                      |
| External causes of injury and poisoning<br><i>e.g., railway accidents, traffic accidents, accidental poisoning by drugs and medicaments, accidental falls, accidents due to natural and environmental factors, surgical and medical complications and misadventures, homicide, and injury purposely inflicted by other persons.</i>                                                              | 800-949, 960-999 | 94                       |
| Senility and ill-defined diseases                                                                                                                                                                                                                                                                                                                                                                | 790-794, 796     | 89                       |
| Respiratory disease<br><i>e.g., acute respiratory infections, influenza, pneumonia, bronchitis, emphysema, and asthma.</i>                                                                                                                                                                                                                                                                       | 460-519          | 49                       |
| Suicide                                                                                                                                                                                                                                                                                                                                                                                          | 950-959          | 49                       |
| Diseases of the digestive system<br><i>e.g., diseases of the oral cavity, salivary glands and jaws, diseases of the stomach/duodenum, appendicitis, hernia of the abdominal cavity, and diseases of the liver, gallbladder, and pancreas.</i>                                                                                                                                                    | 520-577          | 42                       |
| Diseases of the nervous system and sense organs<br><i>e.g., inflammatory diseases of the central nervous system, hereditary and familial diseases of the nervous system, diseases of nerves and peripheral ganglia, Inflammatory diseases of the eye, and diseases of the ear and mastoid process.</i>                                                                                           | 320-389          | 37                       |
| Infectious and parasitic diseases<br><i>e.g., intestinal infectious diseases, tuberculosis, zoonotic bacterial diseases, poliomyelitis and other enterovirus diseases of the central nervous system, viral diseases accompanied by exanthem, arthropod-borne viral diseases, rickettsioses and other arthropod-borne diseases, syphilis and other venereal diseases, mycoses, helminthiasis.</i> | 000-136          | 36                       |
| Mental disorders<br><i>e.g., psychoses, mental retardation, neuroses, personality disorders, and other nonpsychotic mental disorders.</i>                                                                                                                                                                                                                                                        | 290-315          | 31                       |
| Endocrine, nutritional and metabolic diseases or immunity disorders<br><i>e.g., diseases of endocrine glands, avitaminosis and other nutritional deficiencies, and metabolic diseases.</i>                                                                                                                                                                                                       | 240-279          | 29                       |
| Diseases of the genito-urinary system<br><i>e.g., nephritis and nephrosis, diseases of the breast, ovary, fallopian tube/parametrium, and diseases of the uterus and other female genital organs.</i>                                                                                                                                                                                            | 580-629          | 20                       |
| Diseases of the musculoskeletal system and connective tissue                                                                                                                                                                                                                                                                                                                                     | 710-738          | 16                       |

|                                                                                                                                                                                                            |                  |     |
|------------------------------------------------------------------------------------------------------------------------------------------------------------------------------------------------------------|------------------|-----|
| <i>e.g., arthritis and rheumatism, except rheumatic fever, osteomyelitis, joint, and musculoskeletal system.</i>                                                                                           |                  |     |
| Benign neoplasm                                                                                                                                                                                            | 208-239          | 7   |
| Sudden death                                                                                                                                                                                               | 795              | 6   |
| Diseases of the blood and blood-forming organs                                                                                                                                                             | 280-289          | 5   |
| Symptoms referable to systems or organs                                                                                                                                                                    | 780-789          | 3   |
| Congenital anomalies                                                                                                                                                                                       | 740-759          | 3   |
| Complications of pregnancy, childbirth, and the puerperium<br><i>e.g., complications of pregnancy, urinary infections, abortion, delivery, and certain conditions originating in the perinatal period.</i> | 630-676, 760-779 | 2   |
| Uncertain                                                                                                                                                                                                  | -                | 864 |

**Table S4. Hazard ratio (HR) (95% confidence interval (CI)) for the risk of cause-specific premature mortality (before age 70 y) according to early-life abuse and social support among 67,726 female nurses (Nurses' Health Study II, 2001-19).**

| Type of death                                | Crude incidence per 1000 person-years | Events ,No. | HRs (95% CI)                     |                                                                          |                                                                          |
|----------------------------------------------|---------------------------------------|-------------|----------------------------------|--------------------------------------------------------------------------|--------------------------------------------------------------------------|
|                                              |                                       |             | Age-adjusted models <sup>c</sup> | Multivariable models adjusted for childhood characteristics <sup>d</sup> | Full models additionally adjusted for adult characteristics <sup>e</sup> |
| Cumulative abuse history before age 12       |                                       |             |                                  |                                                                          |                                                                          |
| None                                         | 1.85                                  | 946         | 1 [Reference]                    | 1 [Reference]                                                            | 1 [Reference]                                                            |
| Physical abuse only                          | 2.07                                  | 890         | 1.12 (1.02 to 1.22)              | 1.10 (1.00 to 1.21)                                                      | 1.10 (1.00 to 1.20)                                                      |
| Sexual abuse only                            | 1.92                                  | 184         | 1.00 (0.85 to 1.17)              | 0.97 (0.83 to 1.14)                                                      | 0.94 (0.80 to 1.10)                                                      |
| Both physical and sexual abuse               | 2.53                                  | 390         | 1.32 (1.17 to 1.49)              | 1.23 (1.09 to 1.39)                                                      | 1.19 (1.06 to 1.34)                                                      |
| P for trend <sup>b</sup>                     |                                       |             | <0.001                           | 0.004                                                                    | 0.02                                                                     |
| Cumulative abuse history between 12-17 years |                                       |             |                                  |                                                                          |                                                                          |
| None                                         | 1.84                                  | 1235        | 1 [Reference]                    | 1 [Reference]                                                            | 1 [Reference]                                                            |
| Physical abuse only                          | 2.11                                  | 566         | 1.15 (1.04 to 1.27)              | 1.13 (1.02 to 1.24)                                                      | 1.08 (0.98 to 1.20)                                                      |
| Sexual abuse only                            | 1.97                                  | 266         | 1.07 (0.94 to 1.22)              | 1.03 (0.90 to 1.18)                                                      | 1.01 (0.88 to 1.15)                                                      |
| Both physical and sexual abuse               | 2.88                                  | 343         | 1.56 (1.38 to 1.76)              | 1.45 (1.28 to 1.64)                                                      | 1.32 (1.17 to 1.49)                                                      |
| P for trend <sup>b</sup>                     |                                       |             | <0.001                           | <0.001                                                                   | <0.001                                                                   |
| Childhood trauma scale score <sup>a</sup>    |                                       |             |                                  |                                                                          |                                                                          |
| 5 (none)                                     | 1.87                                  | 253         | 1 [Reference]                    | 1 [Reference]                                                            | 1 [Reference]                                                            |
| 6-10                                         | 1.87                                  | 1189        | 1.05 (0.92 to 1.20)              | 1.05 (0.91 to 1.20)                                                      | 1.07 (0.94 to 1.23)                                                      |
| 11-15                                        | 2.03                                  | 553         | 1.14 (0.98 to 1.32)              | 1.11 (0.96 to 1.29)                                                      | 1.12 (0.97 to 1.30)                                                      |
| 16-20                                        | 2.57                                  | 270         | 1.42 (1.19 to 1.68)              | 1.35 (1.13 to 1.60)                                                      | 1.31 (1.10 to 1.56)                                                      |
| 21-25                                        | 3.27                                  | 145         | 1.71 (1.39 to 2.09)              | 1.53 (1.25 to 1.88)                                                      | 1.41 (1.14 to 1.73)                                                      |
| P for trend <sup>b</sup>                     |                                       |             | <0.001                           | <0.001                                                                   | <0.001                                                                   |
| Social support                               |                                       |             |                                  |                                                                          |                                                                          |
| Very often                                   | 1.85                                  | 907         | 1 [Reference]                    | 1 [Reference]                                                            | 1 [Reference]                                                            |
| Often                                        | 1.89                                  | 623         | 1.01 (0.91 to 1.11)              | 1.01 (0.91 to 1.12)                                                      | 1.00 (0.91 to 1.12)                                                      |
| Sometimes                                    | 2.18                                  | 476         | 1.15 (1.03 to 1.29)              | 1.14 (1.02 to 1.28)                                                      | 1.13 (1.01 to 1.26)                                                      |
| Rarely                                       | 2.47                                  | 291         | 1.27 (1.11 to 1.45)              | 1.22 (1.07 to 1.40)                                                      | 1.18 (1.03 to 1.34)                                                      |
| Never                                        | 3.11                                  | 113         | 1.54 (1.26 to 1.87)              | 1.43 (1.17 to 1.74)                                                      | 1.33 (1.09 to 1.62)                                                      |
| P for trend <sup>b</sup>                     |                                       |             | <0.001                           | <0.001                                                                   | <0.001                                                                   |

<sup>a</sup>A summary measure of childhood physical and emotional abuse before age 12 years was assessed using items from the Childhood Trauma Questionnaire short form. <sup>b</sup>P for trend was conducted by modeling the categories of increasing severity of early-life abuse as an ordinal level variable using integer values. <sup>c</sup> In the age-adjusted model, age in months (continuous) at the start of follow-up and the calendar year of the current questionnaire cycle were included as stratified variables to control for age, calendar time, and any possible interactions between these two timescales. <sup>d</sup>Model was additionally adjusted for white race/ethnicity (no or yes), body shape at age 5 (somatogram figure 1, 2, 3, 4 or ≥5), age at menarche (continuous), parental highest education (less than high school, completed high school, more than high school), parents owned a home during infancy (no or yes), parents worked as a professional, manager, or executive during infancy (no or yes), the tier of birth (North, Middle, South, outside of US or uncertain). <sup>e</sup>Based on multivariable models with further adjustment for time-varying BMI (<24.9, 25-29.9, 30-34.9, or ≥35 kg/m<sup>2</sup>), smoking status (never, former, current 1-34 cigarettes/day, or current ≥35 cigarettes/day), parity (≤1, 2, or ≥3), Alternative Healthy Eating Index 2010 dietary score (five categories), alcohol intake (0, 1-14, ≥15 g/d), oral contraceptive use (never, past, or current), menopausal status (premenopausal, postmenopausal, or uncertain), and postmenopausal hormone use (never, past, or current).

**Table S5. Hazard ratio (HR) (95% confidence interval (CI)) for the risk of cause-specific premature mortality (before age 70 y), according to the cumulative history of physical and sexual abuse during childhood or adolescence among 67,726 female nurses (Nurses' Health Study II, 2001-19).**

| Cause-specific mortality                                                                | Cumulative history of physical and sexual abuse |                              |                                           |                                    |                                      | P for trend <sup>c</sup> |
|-----------------------------------------------------------------------------------------|-------------------------------------------------|------------------------------|-------------------------------------------|------------------------------------|--------------------------------------|--------------------------|
|                                                                                         | No abuse                                        | Mild or moderate single type | Mild multiple types or severe single type | Moderate chronic or multiple types | Severe chronic and/or multiple types |                          |
| Cancer                                                                                  |                                                 |                              |                                           |                                    |                                      |                          |
| Events/crude incidence per 1000 person-years                                            | 289/0.70                                        | 327/0.74                     | 132/0.72                                  | 74/0.80                            | 52/0.86                              |                          |
| HR (95% CI) in multivariable models adjusted for childhood characteristics <sup>a</sup> | 1.00 [Reference]                                | 1.03 (0.87 to 1.20)          | 0.99 (0.80 to 1.21)                       | 1.09 (0.84 to 1.41)                | 1.03 (0.77 to 1.39)                  | 0.70                     |
| HR (95% CI) in full models additionally adjusted for adult characteristics <sup>b</sup> | 1.00 [Reference]                                | 1.04 (0.89 to 1.22)          | 1.02 (0.83 to 1.26)                       | 1.06 (0.82 to 1.38)                | 1.03 (0.76 to 1.39)                  | 0.72                     |
| CVD                                                                                     |                                                 |                              |                                           |                                    |                                      |                          |
| Events/crude incidence per 1000 person-years                                            | 48/0.12                                         | 59/0.13                      | 16/0.09                                   | 13/0.14                            | 18/0.30                              |                          |
| HR (95% CI) in multivariable models adjusted for childhood characteristics <sup>a</sup> | 1.00 [Reference]                                | 1.12 (0.77 to 1.65)          | 0.66 (0.37 to 1.16)                       | 1.07 (0.57 to 1.98)                | 1.98 (1.14 to 3.43)                  | 0.21                     |
| HR (95% CI) in full models additionally adjusted for adult characteristics <sup>b</sup> | 1.00 [Reference]                                | 1.11 (0.75 to 1.63)          | 0.62 (0.35 to 1.11)                       | 0.87 (0.46 to 1.62)                | 1.70 (0.97 to 3.00)                  | 0.59                     |
| External causes of injury and poisoning                                                 |                                                 |                              |                                           |                                    |                                      |                          |
| Events/crude incidence per 1000 person-years                                            | 25/0.06                                         | 29/0.07                      | 14/0.08                                   | 12/0.13                            | 14/0.23                              |                          |
| HR (95% CI) in multivariable models adjusted for childhood characteristics <sup>a</sup> | 1.00 [Reference]                                | 1.04 (0.61 to 1.78)          | 1.18 (0.61 to 2.28)                       | 2.04 (1.02 to 4.09)                | 3.39 (1.74 to 6.60)                  | <0.001                   |
| HR (95% CI) in full models additionally adjusted for adult characteristics <sup>b</sup> | 1.00 [Reference]                                | 1.00 (0.58 to 1.71)          | 1.08 (0.56 to 2.10)                       | 1.85 (0.92 to 3.73)                | 2.76 (1.40 to 5.44)                  | 0.003                    |
| Senility and ill-defined diseases                                                       |                                                 |                              |                                           |                                    |                                      |                          |
| Events/crude incidence per 1000 person-years                                            | 32/0.08                                         | 34/0.08                      | 10/0.05                                   | 4/0.04                             | 9/0.15                               |                          |
| HR (95% CI) in multivariable models adjusted for childhood characteristics <sup>a</sup> | 1.00 [Reference]                                | 1.01 (0.62 to 1.65)          | 0.68 (0.33 to 1.39)                       | 0.48 (0.16 to 1.44)                | 1.67 (0.79 to 3.54)                  | 0.94                     |
| HR (95% CI) in full models additionally adjusted for adult characteristics <sup>b</sup> | 1.00 [Reference]                                | 1.02 (0.62 to 1.67)          | 0.65 (0.31 to 1.34)                       | 0.34 (0.11 to 1.08)                | 1.54 (0.72 to 3.32)                  | 0.58                     |
| Suicide                                                                                 |                                                 |                              |                                           |                                    |                                      |                          |
| Events/crude incidence per 1000 person-years                                            | 13/0.03                                         | 16/0.04                      | 6/0.03                                    | 4/0.04                             | 10/0.17                              |                          |
| HR (95% CI) in multivariable models adjusted for childhood characteristics <sup>a</sup> | 1.00 [Reference]                                | 1.18 (0.57 to 2.46)          | 0.94 (0.36 to 2.50)                       | 1.29 (0.42 to 4.00)                | 4.32 (1.85 to 10.08)                 | 0.007                    |
| HR (95% CI) in full models additionally adjusted for adult characteristics <sup>b</sup> | 1.00 [Reference]                                | 1.22 (0.58 to 2.57)          | 0.99 (0.37 to 2.65)                       | 1.27 (0.40 to 3.98)                | 3.82 (1.59 to 9.18)                  | 0.02                     |
| Respiratory disease                                                                     |                                                 |                              |                                           |                                    |                                      |                          |
| Events/crude incidence per 1000 person-years                                            | 12/0.03                                         | 13/0.03                      | 10/0.05                                   | 5/0.05                             | 9/0.15                               |                          |
| HR (95% CI) in multivariable models adjusted for childhood characteristics <sup>a</sup> | 1.00 [Reference]                                | 0.97 (0.44 to 2.13)          | 1.65 (0.71 to 3.87)                       | 1.81 (0.63 to 5.17)                | 3.72 (1.54 to 9.00)                  | 0.002                    |
| HR (95% CI) in full models additionally adjusted for adult characteristics <sup>b</sup> | 1.00 [Reference]                                | 0.90 (0.40 to 1.99)          | 1.38 (0.58 to 3.28)                       | 1.27 (0.43 to 3.72)                | 3.12 (1.26 to 7.68)                  | 0.02                     |
| Diseases of the digestive system                                                        |                                                 |                              |                                           |                                    |                                      |                          |
| Events/crude incidence per 1000 person-years                                            | 9/0.02                                          | 16/0.04                      | 4/0.02                                    | 8/0.09                             | 5/0.08                               |                          |
| HR (95% CI) in multivariable models adjusted for childhood characteristics <sup>a</sup> | 1.00 [Reference]                                | 1.68 (0.74 to 3.82)          | 0.93 (0.29 to 3.05)                       | 3.67 (1.40, 9.63)                  | 3.30 (1.08 to 10.09)                 | 0.01                     |
| HR (95% CI) in full models additionally adjusted for adult characteristics <sup>b</sup> | 1.00 [Reference]                                | 1.53 (0.66 to 3.54)          | 0.76 (0.23 to 2.52)                       | 2.69 (0.99 to 7.30)                | 2.56 (0.81 to 8.10)                  | 0.08                     |

<sup>a</sup>Model was adjusted for age (continuous), white race/ethnicity (no or yes), body shape at age 5 (somatogram figure 1, 2, 3, 4 or ≥5), age at menarche (continuous), parental highest education (less than high school, completed high school, or more than high school), parents owned home during infancy (no or yes), parents worked as a professional, manager, or executive during infancy (no or yes), the tier of birth (North, Middle, South, or outside of US or uncertain). <sup>b</sup>Based on multivariable models with further adjustment for time-varying BMI (<24.9, 25-29.9, 30-34.9, or ≥35 kg/m<sup>2</sup>), smoking status (never, former, current 1-34 cigarettes/day, or current ≥35 cigarettes/day), parity (≤1, 2, or ≥3), Alternative Healthy Eating Index 2010 dietary score (five categories), alcohol intake (0, 1-14, or ≥15 g/d), oral



contraceptive use (never, past, or current), menopausal status (premenopausal, postmenopausal, or uncertain), and postmenopausal hormone use (never, past, or current). <sup>c</sup>P for trend was conducted by modeling the categories of increasing severity of physical and sexual abuse as an ordinal level variable using integer values.

**Table S6. Hazard ratio (HR) (95% confidence interval (CI)) for the risk of cause-specific premature mortality (before age 70 y) according to the joint categories of early life physical abuse, sexual abuse, and social support among 67,726 female nurses (Nurses' Health Study II, 2001-19).**

| Exposure categories                                          | Death cases | Crude incidence per 1000 person-years | HR (95% CI) <sup>a</sup> |
|--------------------------------------------------------------|-------------|---------------------------------------|--------------------------|
| <b>Joint categories of physical and sexual abuse</b>         |             |                                       |                          |
| No physical abuse                                            |             |                                       |                          |
| No sexual abuse                                              | 950         | 1.83                                  | 1.00 [Reference]         |
| Sexual touching                                              | 55          | 1.86                                  | 0.94 (0.72 to 1.24)      |
| Forced sexual activity                                       | 12          | 2.20                                  | 0.85 (0.48 to 1.51)      |
| Mild to moderate physical abuse                              |             |                                       |                          |
| No sexual abuse                                              | 266         | 1.82                                  | 1.04 (0.90 to 1.19)      |
| Sexual touching                                              | 139         | 1.94                                  | 1.00 (0.84 to 1.20)      |
| Forced sexual activity                                       | 13          | 3.20                                  | 1.66 (0.96 to 2.88)      |
| Severe physical abuse                                        |             |                                       |                          |
| Non sexual abuse                                             | 495         | 2.11                                  | 1.12 (1.00 to 1.25)      |
| Sexual touching                                              | 374         | 2.37                                  | 1.16 (1.02 to 1.31)      |
| Forced sexual activity                                       | 106         | 4.56                                  | 1.94 (1.58 to 2.37)      |
| p for multiplicative interaction                             | -           | -                                     | 0.01                     |
| RERI (95% CI)                                                | -           | -                                     | 0.11 (0.04 to 0.18)      |
| p for additive interaction                                   | -           | -                                     | 0.004                    |
| <b>Joint categories of physical abuse and social support</b> |             |                                       |                          |
| Receiving social support                                     |             |                                       |                          |
| No physical abuse                                            | 935         | 1.80                                  | 1.00 [Reference]         |
| Mild to moderate physical abuse                              | 362         | 1.85                                  | 1.05 (0.93 to 1.19)      |
| Severe physical abuse                                        | 709         | 2.19                                  | 1.16 (1.05 to 1.28)      |
| Rarely or never receiving social support                     |             |                                       |                          |
| No physical abuse                                            | 82          | 2.27                                  | 1.14 (0.91 to 1.43)      |
| Mild to moderate physical abuse                              | 56          | 2.14                                  | 1.06 (0.81 to 1.39)      |
| Severe physical abuse                                        | 266         | 2.89                                  | 1.35 (1.17 to 1.55)      |
| p for multiplicative interaction                             | -           | -                                     | 0.66                     |
| RERI (95% CI)                                                | -           | -                                     | 0.04 (-0.09 to 0.18)     |
| p for additive interaction                                   | -           | -                                     | 0.55                     |
| <b>Joint categories of sexual abuse and social support</b>   |             |                                       |                          |
| Receiving social support                                     |             |                                       |                          |
| No sexual abuse                                              | 1311        | 1.84                                  | 1.00 [Reference]         |
| Sexual touching                                              | 622         | 2.04                                  | 1.03 (0.93 to 1.13)      |
| Forced sexual activity                                       | 73          | 3.31                                  | 1.42 (1.12 to 1.81)      |
| Rarely or never receiving social support                     |             |                                       |                          |
| No sexual abuse                                              | 192         | 2.35                                  | 1.14 (0.98 to 1.32)      |
| Sexual touching                                              | 154         | 2.49                                  | 1.11 (0.93 to 1.31)      |
| Forced sexual activity                                       | 58          | 5.39                                  | 2.12 (1.62 to 2.77)      |
| p for multiplicative interaction                             | -           | -                                     | 0.12                     |
| RERI (95% CI)                                                | -           | -                                     | 0.17 (-0.02 to 0.36)     |
| p for additive interaction                                   | -           | -                                     | 0.08                     |

RERI: relative excess risk due to interaction.

<sup>a</sup>Model was adjusted for age (continuous), white race/ethnicity (no or yes), body shape at age 5 (somatogram figure 1, 2, 3, 4 or ≥5), age at menarche (continuous), parental highest education (less than high school, completed high school, or more than high school), parents owned home during infancy (no or yes), parents worked as a professional, manager, or executive during infancy (no or yes), the tier of birth (North, Middle,

South, or outside of US or uncertain), as well as time-varying BMI (<24.9, 25-29.9, 30-34.9, or  $\geq 35$  kg/m<sup>2</sup>), smoking status (never, former, current 1-34 cigarettes/day, or current  $\geq 35$  cigarettes/day), parity ( $\leq 1$ , 2, or  $\geq 3$ ), Alternative Healthy Eating Index 2010 dietary score (five categories), alcohol intake (0, 1-14, or  $\geq 15$  g/d), oral contraceptive use (never, past, or current), menopausal status (premenopausal, postmenopausal, or uncertain), and postmenopausal hormone use (never, past, or current).

**Table S7. Sensitivity analyses for the associations between early life physical and sexual abuse and the risk of all-cause mortality (Nurses' Health Study II, 2001-19).**

| Physical and sexual abuse                        | With more stringent adjustments for smoking <sup>a</sup> |                     | Excluding women reporting a diagnosis of CVD or cancer in 2001 <sup>b</sup> |                     | Including death at any ages <sup>b</sup> |                     | Including premature death before age 65 years <sup>b</sup> |                     | Based on full models with mutual adjustment for the other early-life abuse (physical or sexual abuse) <sup>c</sup> |                     |
|--------------------------------------------------|----------------------------------------------------------|---------------------|-----------------------------------------------------------------------------|---------------------|------------------------------------------|---------------------|------------------------------------------------------------|---------------------|--------------------------------------------------------------------------------------------------------------------|---------------------|
|                                                  | Death cases                                              | HR (95% CI)         | Death cases                                                                 | HR (95% CI)         | Death cases                              | HR (95% CI)         | Death cases                                                | HR (95% CI)         | Death cases                                                                                                        | HR (95% CI)         |
| The severity of physical abuse                   |                                                          |                     |                                                                             |                     |                                          |                     |                                                            |                     |                                                                                                                    |                     |
| None                                             | 1017                                                     | 1 [Reference]       | 793                                                                         | 1 [Reference]       | 1068                                     | 1 [Reference]       | 806                                                        | 1 [Reference]       | 1017                                                                                                               | 1 [Reference]       |
| Mild physical abuse                              | 418                                                      | 1.02 (0.91 to 1.15) | 322                                                                         | 1.03 (0.90 to 1.17) | 434                                      | 1.03 (0.92 to 1.16) | 321                                                        | 1.01 (0.88 to 1.14) | 418                                                                                                                | 1.04 (0.93 to 1.16) |
| Moderate physical abuse                          | 652                                                      | 1.10 (0.99 to 1.21) | 507                                                                         | 1.11 (1.00 to 1.25) | 685                                      | 1.11 (1.01 to 1.22) | 503                                                        | 1.07 (0.96 to 1.20) | 652                                                                                                                | 1.10 (1.00 to 1.22) |
| Severe physical abuse                            | 323                                                      | 1.37 (1.20 to 1.55) | 241                                                                         | 1.43 (1.23 to 1.65) | 330                                      | 1.38 (1.22 to 1.57) | 254                                                        | 1.41 (1.22 to 1.63) | 323                                                                                                                | 1.40 (1.23 to 1.60) |
| P for trend                                      |                                                          | <0.001              |                                                                             | <0.001              |                                          | <0.001              |                                                            | <0.001              |                                                                                                                    | <0.001              |
| The severity of sexual abuse                     |                                                          |                     |                                                                             |                     |                                          |                     |                                                            |                     |                                                                                                                    |                     |
| None                                             | 1503                                                     | 1 [Reference]       | 1151                                                                        | 1 [Reference]       | 1571                                     | 1 [Reference]       | 1191                                                       | 1 [Reference]       | 1503                                                                                                               | 1 [Reference]       |
| Sexual touching as a child or adolescent         | 530                                                      | 0.98 (0.89 to 1.08) | 432                                                                         | 1.08 (0.96 to 1.20) | 549                                      | 0.98 (0.89 to 1.08) | 396                                                        | 0.95 (0.84 to 1.06) | 530                                                                                                                | 0.98 (0.89 to 1.08) |
| Forced sexual activity as a child or adolescent  | 246                                                      | 1.07 (0.93 to 1.23) | 193                                                                         | 1.17 (1.00 to 1.37) | 261                                      | 1.13 (0.99 to 1.29) | 186                                                        | 1.06 (0.90 to 1.23) | 246                                                                                                                | 1.08 (0.94 to 1.24) |
| Forced sexual activity as a child and adolescent | 131                                                      | 1.61 (1.34 to 1.93) | 87                                                                          | 1.52 (1.22 to 1.90) | 136                                      | 1.64 (1.37 to 1.95) | 111                                                        | 1.75 (1.44 to 2.14) | 131                                                                                                                | 1.59 (1.32 to 1.91) |
| P for trend                                      |                                                          | <0.001              |                                                                             | <0.001              |                                          | <0.001              |                                                            | <0.001              |                                                                                                                    | <0.001              |

<sup>a</sup>Model was adjusted for age (continuous), white race/ethnicity (no or yes), body shape at age 5 (somatogram figure 1, 2, 3, 4 or ≥5), age at menarche (continuous), parental highest education (less than high school, completed high school, or more than high school), parents owned a home during infancy (no or yes), parents worked as a professional, manager, or executive during infancy (no or yes), the tier of birth (North, Middle, South, or outside of US or uncertain), as well as time-varying BMI (<24.9, 25-29.9, 30-34.9, or ≥35 kg/m<sup>2</sup>), smoking status (never, former, current), pack-years of smoking (continuous), the square of pack-years (continuous), parity (≤1, 2, or ≥3), Alternative Healthy Eating Index 2010 dietary score (five categories), alcohol intake (0, 1-14, or ≥15 g/d), oral contraceptive use (never, past, or current), menopausal status (premenopausal, postmenopausal, or uncertain), and postmenopausal hormone use (never, past, or current).

<sup>b</sup>Model was adjusted for age (continuous), white race/ethnicity (no or yes), somatogram at age 5 (figure 1, 2, 3, 4 or ≥5), age at menarche (continuous), parental highest education (less than high school, completed high school, or more than high school), parents owned a home during infancy (no or yes), parents worked as a professional, manager, or executive during infancy (no or yes), tier of birth (North, Middle, South, or outside of US or uncertain), as well as time-varying BMI (<24.9, 25-29.9, 30-34.9, or ≥35 kg/m<sup>2</sup>), smoking status (never, former, current 1-34 cigarettes/day, or current ≥35 cigarettes/day), parity (≤1, 2, or ≥3), Alternative Healthy Eating Index 2010 dietary score (five categories), alcohol intake (0, 1-14, or ≥15 g/d), oral contraceptive use (never, past, or current), menopausal status (premenopausal, postmenopausal, or uncertain), and postmenopausal hormone use (never, past, or current).

<sup>c</sup>Model was adjusted for age (continuous), white race/ethnicity (no or yes), somatogram at age 5 (figure 1, 2, 3, 4 or ≥5), age at menarche (continuous), parental highest education (less than high school, completed high school, or more than high school), parents owned a home during infancy (no or yes), parents worked as a professional, manager, or executive during infancy (no or yes), tier of birth (North, Middle, South, or outside of US or uncertain), as well as time-varying BMI (<24.9, 25-29.9, 30-34.9, or ≥35 kg/m<sup>2</sup>), smoking status (never, former, current 1-34 cigarettes/day, or current ≥35 cigarettes/day), parity (≤1, 2, or ≥3), Alternative Healthy Eating Index 2010 dietary score (five categories), alcohol intake (0, 1-14, or ≥15 g/d), oral contraceptive use (never, past, or current), menopausal status (premenopausal, postmenopausal, or uncertain), postmenopausal hormone use (never, past, or current), and the other early-life abuse (physical or sexual abuse).
